# Supplementary material for: ALD of Pt nanotube arrays supported on a carbon fiber cloth as a high-performance electrocatalyst for methanol oxidation
Source: Royal Society of Chemistry journal article supplement (doi:10.1039/c6ta06457d), 2016-01-01
Supplement: c6ta06457d1.pdf [file c6ta06457d1.pdf]

## Supplementary Information

### ALD of Pt nanotube arrays supported on carbon fiber cloth as high-performance electrocatalyst for methanol oxidation

Haifeng Zhang<sup>1</sup>, Chuanwei Cheng<sup>1\*</sup>

<sup>1</sup>Shanghai Key Laboratory of Special Artificial Microstructure Materials and Technology, School of Physics Science and Engineering, Tongji University, Shanghai 200092, P.R. China

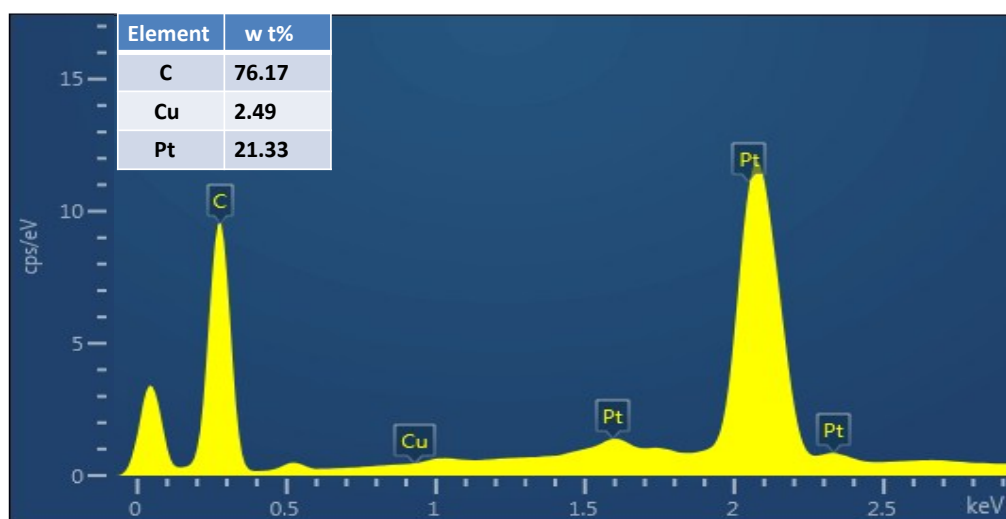

**Figure S1** EDX spectra of the Pt NTAs /CFC

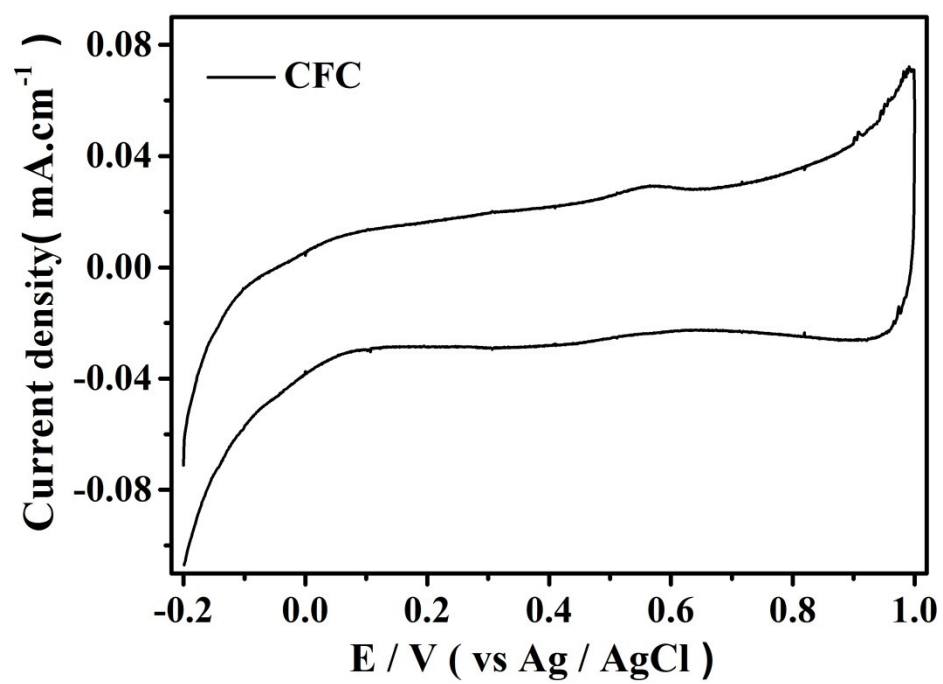

**Figure S2** CVs of bare carbon cloth substrate in 0.5 M  $\text{CH}_3\text{OH}$  + 0.5 M  $\text{H}_2\text{SO}_4$  at 50 mV/s

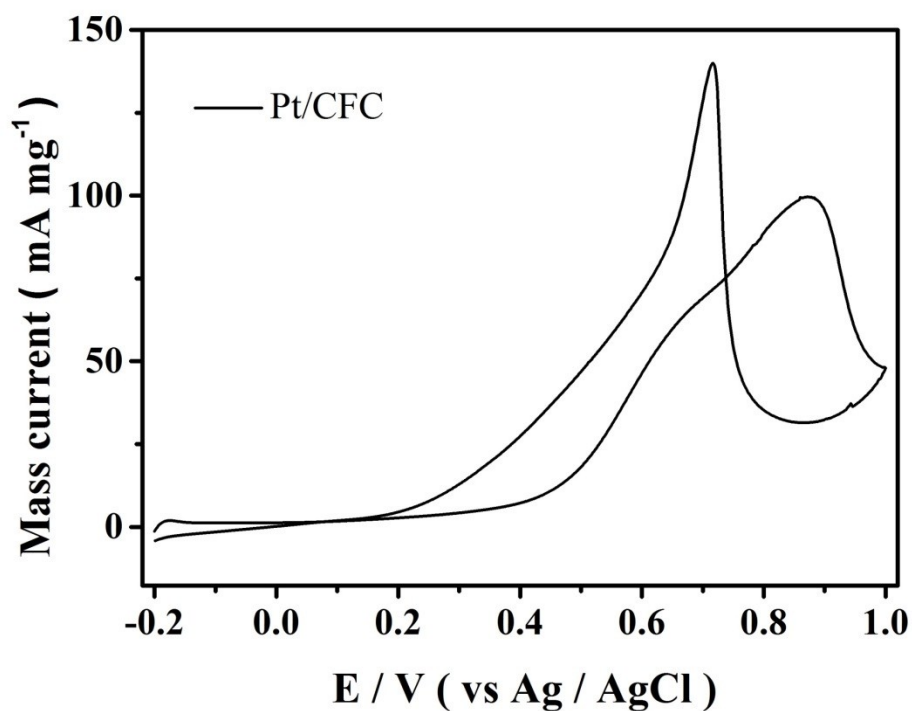

**Figure S3** CVs of 200C Pt /CFC in 0.5 M CH<sub>3</sub>OH + 0.5 M H<sub>2</sub>SO<sub>4</sub> at 50 mV/s.

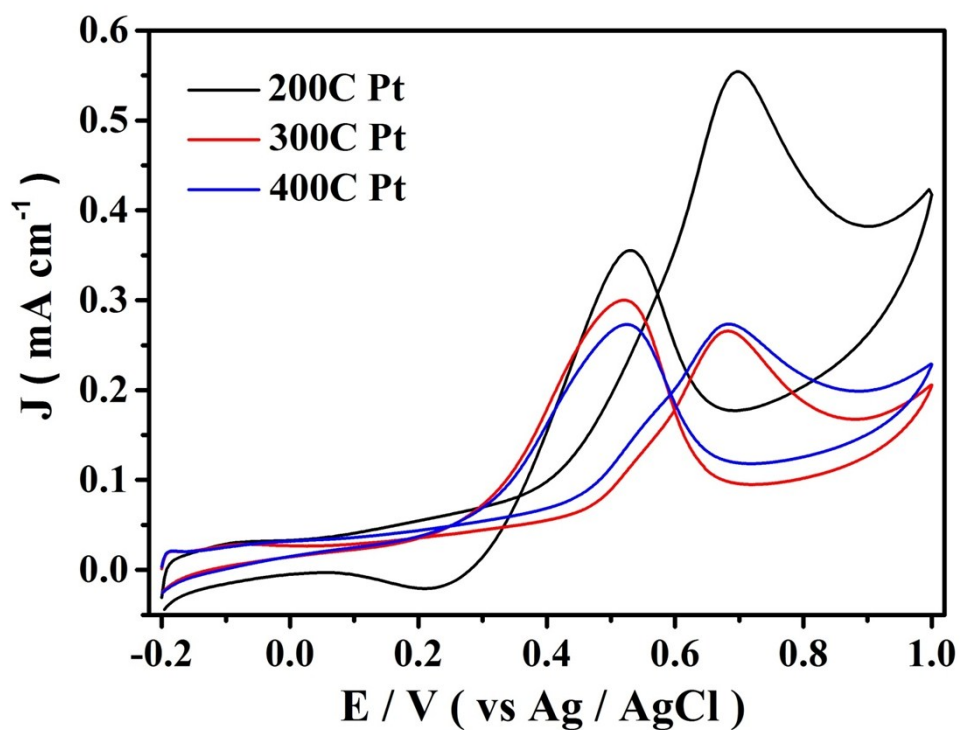

**Figure S4.** CVs of 200C Pt NTAs/CFC, 300C Pt NTAs/CFC and 400C Pt NTAs/CFC in the solution of 0.5 M CH<sub>3</sub>OH + 0.5 M H<sub>2</sub>SO<sub>4</sub> at 50 mV/s.(the current densities all are normalized to the ECSAs of catalysts)

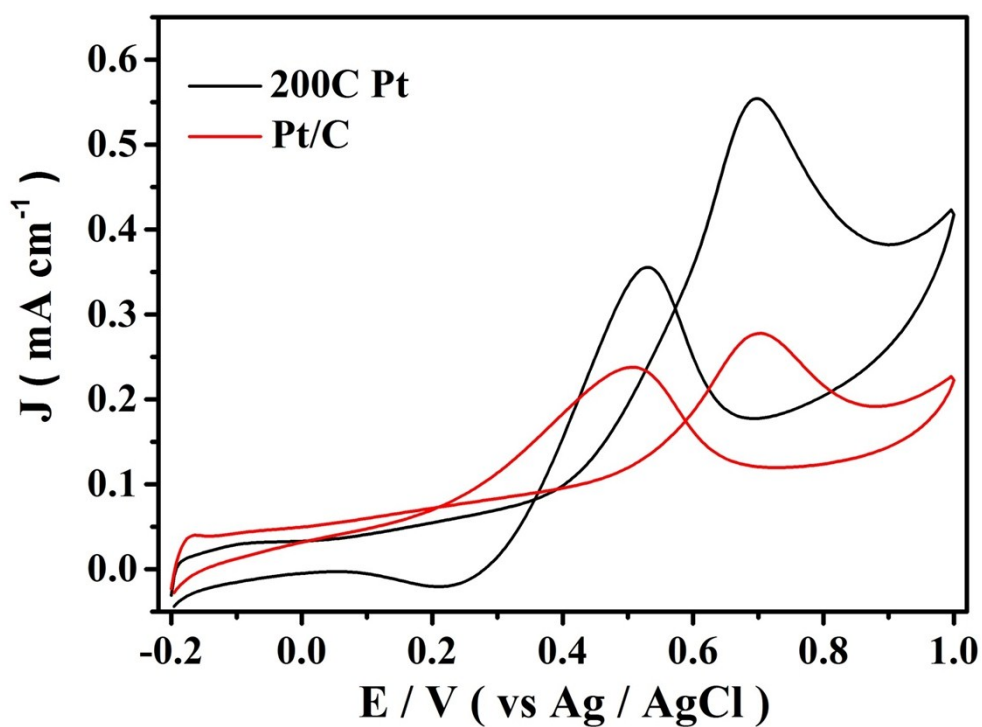

**Figure S5.** CVs of 200C Pt NTAs/CFC and Pt/C/CFC in the solution of 0.5 M  $\text{CH}_3\text{OH}$  + 0.5 M  $\text{H}_2\text{SO}_4$  at 50 mV/s. (the current densities all are normalized to the ECSAs of catalysts)

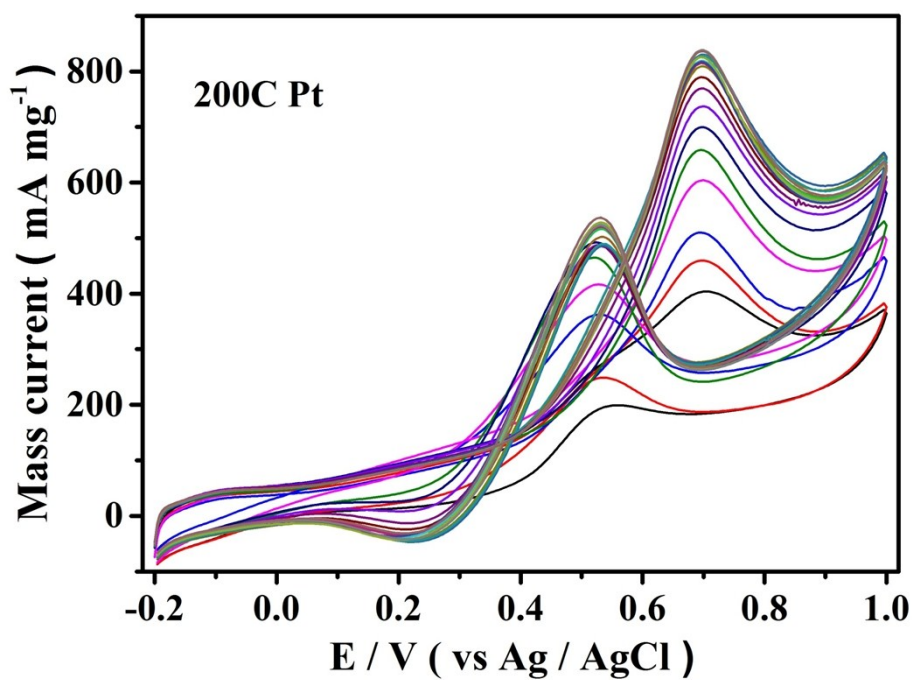

**Figure S6** CVs of 200C Pt NTAs/CFC catalyst from the 1<sup>st</sup> to the 200<sup>th</sup> cycle in the solution of 0.5 M  $\text{CH}_3\text{OH}$  + 0.5 M  $\text{H}_2\text{SO}_4$  at 50 mV/s.

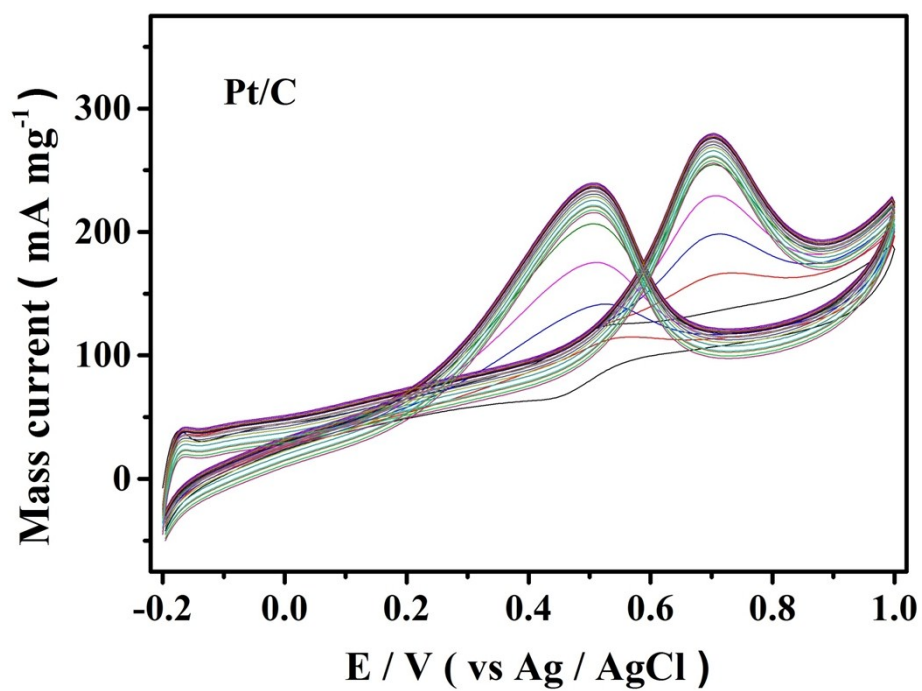

**Figure S7** CVs of Pt/C/CFC catalyst from the 1<sup>st</sup> to the 200<sup>th</sup> cycle in the solution of 0.5 M  $\text{CH}_3\text{OH}$  + 0.5 M  $\text{H}_2\text{SO}_4$  at 50 mV/s.
